# Supplementary material for: HLA-G 3′ untranslated region variants +3187G/G, +3196G/G and +3035T define diametrical clinical status and disease outcome in epithelial ovarian cancer
Source: PubMed Central journal article supplement (PMC6443684; doi:10.1038/s41598-019-41900-z), 2019-04-01
Supplement: 41598_2019_41900_MOESM1_ESM.pdf [file 41598_2019_41900_MOESM1_ESM.pdf]

# ***HLA-G 3' untranslated region variants +3187G/G, +3196G/G and +3035T define diametrical clinical status and disease outcome in epithelial ovarian cancer***

Esther Schwich<sup>1</sup>, Vera Rebmann<sup>1\*</sup>, Rafael Tomoya Michita<sup>1,2</sup>, Hana Rohn<sup>3</sup>, Jan Willem Voncken<sup>4</sup>, Peter A. Horn<sup>1</sup>, Rainer Kimmig<sup>5</sup>, Sabine Kasimir-Bauer<sup>5</sup>, Paul Buderath<sup>5</sup>

<sup>1</sup> Institute for Transfusion Medicine, University Hospital Essen, University of Duisburg-Essen, Virchowstr. 179, 45147 Essen, Germany

<sup>2</sup> Genetics Department, Post-Graduation Program in Genetics and Molecular Biology, Universidade Federal do Rio Grande do Sul (UFRGS), Porto Alegre, Brazil

<sup>3</sup> Department of Infectious Diseases, University Hospital Essen, University of Duisburg-Essen, Hufelandstr. 55, 45147 Essen, Germany

<sup>4</sup> Molecular Genetics, Maastricht University, PO Box 6161, 6200 MD Maastricht, Netherlands

<sup>5</sup> Department for Gynecology and Obstetrics, University Hospital Essen, University of Duisburg-Essen, Hufelandstr. 55, 45147 Essen, Germany

|                       |                                                                                          |
|-----------------------|------------------------------------------------------------------------------------------|
| Esther Schwich        | <a href="mailto:Esther.Schwich@uk-essen.de">Esther.Schwich@uk-essen.de</a>               |
| Vera Rebmann          | <a href="mailto:Vera.Rebmann@uk-essen.de">Vera.Rebmann@uk-essen.de</a>                   |
| Rafael Tomoya Michita | <a href="mailto:rafael.michita@gmail.com">rafael.michita@gmail.com</a>                   |
| Hana Rohn             | <a href="mailto:Hana.Rohn@uk-essen.de">Hana.Rohn@uk-essen.de</a>                         |
| Jan Willem Voncken    | <a href="mailto:W.Voncken@maastrichtuniversity.nl">W.Voncken@maastrichtuniversity.nl</a> |
| Peter A. Horn         | <a href="mailto:Peter.Horn@uk-essen.de">Peter.Horn@uk-essen.de</a>                       |
| Rainer Kimmig         | <a href="mailto:Rainer.Kimmig@uk-essen.de">Rainer.Kimmig@uk-essen.de</a>                 |
| Sabine Kasimir-Bauer  | <a href="mailto:Sabine.Kasimir-Bauer@uk-essen.de">Sabine.Kasimir-Bauer@uk-essen.de</a>   |
| Paul Buderath         | <a href="mailto:Paul.Buderath@uk-essen.de">Paul.Buderath@uk-essen.de</a>                 |

## **\* Correspondence:**

Vera Rebmann

Institute for Transfusion Medicine  
University Hospital Essen  
University of Duisburg-Essen  
Virchowstr. 179  
45147 Essen  
Germany  
Phone: +49 201 723 4206  
[Vera.Rebmann@uk-essen.de](mailto:Vera.Rebmann@uk-essen.de)

**Supplementary Information 1. Sequence comparison of the most frequent haplotypes of the *HLA-G* 3'UTR.**

|       | UTR-1 | UTR-2/<br>undes. | UTR-5 | UTR-7 | UTR-3 | UTR-4 | UTR-6/<br>18 |
|-------|-------|------------------|-------|-------|-------|-------|--------------|
| +2961 | DEL   | INS              | INS   | INS   | DEL   | DEL   | DEL          |
| +3003 | T     | T                | T     | T     | T     | C     | T            |
| +3010 | G     | C                | C     | C     | C     | G     | G            |
| +3027 | C     | C                | C     | A     | C     | C     | C            |
| +3035 | C     | C                | T     | T     | C     | C     | C            |
| +3142 | C     | G/C              | G     | G     | G     | C     | C            |
| +3187 | G     | A                | A     | A     | A     | A     | A            |
| +3196 | C     | G                | C     | C     | C     | C     | C            |
| +3227 | G     | G                | G     | G     | G     | G     | G/A          |
