# Supplementary material for: HLA-G 3′ untranslated region variants +3187G/G, +3196G/G and +3035T define diametrical clinical status and disease outcome in epithelial ovarian cancer
Source: PubMed Central journal article supplement (PMC6443684; doi:10.1038/s41598-019-41900-z), 2019-04-01
Supplement: 41598_2019_41900_MOESM2_ESM.pdf [file 41598_2019_41900_MOESM2_ESM.pdf]

# ***HLA-G 3' untranslated region variants +3187G/G, +3196G/G and +3035T define diametrical clinical status and disease outcome in epithelial ovarian cancer***

Esther Schwich<sup>1</sup>, Vera Rebmann<sup>1\*</sup>, Rafael Tomoya Michita<sup>1,2</sup>, Hana Rohn<sup>3</sup>, Jan Willem Voncken<sup>4</sup>, Peter A. Horn<sup>1</sup>, Rainer Kimmig<sup>5</sup>, Sabine Kasimir-Bauer<sup>5</sup>, Paul Buderath<sup>5</sup>

<sup>1</sup> Institute for Transfusion Medicine, University Hospital Essen, University of Duisburg-Essen, Virchowstr. 179, 45147 Essen, Germany

<sup>2</sup> Genetics Department, Post-Graduation Program in Genetics and Molecular Biology, Universidade Federal do Rio Grande do Sul (UFRGS), Porto Alegre, Brazil

<sup>3</sup> Department of Infectious Diseases, University Hospital Essen, University of Duisburg-Essen, Hufelandstr. 55, 45147 Essen, Germany

<sup>4</sup> Molecular Genetics, Maastricht University, PO Box 6161, 6200 MD Maastricht, Netherlands

<sup>5</sup> Department for Gynecology and Obstetrics, University Hospital Essen, University of Duisburg-Essen, Hufelandstr. 55, 45147 Essen, Germany

|                       |                                                                                          |
|-----------------------|------------------------------------------------------------------------------------------|
| Esther Schwich        | <a href="mailto:Esther.Schwich@uk-essen.de">Esther.Schwich@uk-essen.de</a>               |
| Vera Rebmann          | <a href="mailto:Vera.Rebmann@uk-essen.de">Vera.Rebmann@uk-essen.de</a>                   |
| Rafael Tomoya Michita | <a href="mailto:rafael.michita@gmail.com">rafael.michita@gmail.com</a>                   |
| Hana Rohn             | <a href="mailto:Hana.Rohn@uk-essen.de">Hana.Rohn@uk-essen.de</a>                         |
| Jan Willem Voncken    | <a href="mailto:W.Voncken@maastrichtuniversity.nl">W.Voncken@maastrichtuniversity.nl</a> |
| Peter A. Horn         | <a href="mailto:Peter.Horn@uk-essen.de">Peter.Horn@uk-essen.de</a>                       |
| Rainer Kimmig         | <a href="mailto:Rainer.Kimmig@uk-essen.de">Rainer.Kimmig@uk-essen.de</a>                 |
| Sabine Kasimir-Bauer  | <a href="mailto:Sabine.Kasimir-Bauer@uk-essen.de">Sabine.Kasimir-Bauer@uk-essen.de</a>   |
| Paul Buderath         | <a href="mailto:Paul.Buderath@uk-essen.de">Paul.Buderath@uk-essen.de</a>                 |

## **\* Correspondence:**

Vera Rebmann

Institute for Transfusion Medicine  
University Hospital Essen  
University of Duisburg-Essen  
Virchowstr. 179  
45147 Essen  
Germany  
Phone: +49 201 723 4206  
[Vera.Rebmann@uk-essen.de](mailto:Vera.Rebmann@uk-essen.de)



**Supplementary Data 2. Haplotype frequencies of polymorphic sites detected at the *HLA-G* 3'UTR in epithelial ovarian cancer patients (n=79) and healthy donors (n=75).**

| <b>Haplotype</b>  | <b>Frequency total</b> | <b>Frequency HD</b> | <b>Frequency EOC</b> |
|-------------------|------------------------|---------------------|----------------------|
| <b>UTR-1</b>      | 0.2919                 | 0.2864              | 0.2972               |
| <b>UTR-2</b>      | 0.2880                 | 0.2786              | 0.2969               |
| <b>UTR-3</b>      | 0.0916                 | 0.1144              | 0.0699               |
| <b>UTR-4</b>      | 0.1591                 | 0.1666              | 0.1519               |
| <b>UTR-5</b>      | 0.0195                 | 0.0133              | 0.0253               |
| <b>UTR-6</b>      | 0.0255                 | 0.0192              | 0.0315               |
| <b>UTR-7</b>      | 0.0552                 | 0.0533              | 0.0570               |
| <b>UTR-18</b>     | 0.0292                 | 0.0333              | 0.0253               |
| <b>UTR-undes.</b> | 0.0130                 | 0.0000              | 0.0254               |

Haplotype phasing was assessed by PHASE 2.1 software using default parameters.

EOC – epithelial ovarian cancer; HD – healthy donors; undes. – undesignated (see **Additional File 1** for reference);  
UTR – untranslated region

**Supplementary Data 3. Haplotype and genotype frequencies of the *HLA-G* 3'UTR in EOC patients and healthy donors.**

|              | <b>HD</b><br>N=75 (%) | <b>EOC</b><br>N=79 (%) | $p^a$  | <b>OR</b><br>(95% CI) |
|--------------|-----------------------|------------------------|--------|-----------------------|
| <b>UTR-1</b> |                       |                        |        |                       |
| pos          | 39 (0.52)             | 41 (0.52)              |        |                       |
| neg          | 36 (0.48)             | 38 (0.48)              | 0.9900 | 1.004 (0.533 – 1.890) |
| Genotypes    |                       |                        |        |                       |
| UTR-1/UTR-1  | 4 (0.05)              | 6 (0.08)               |        |                       |
| UTR-1/UTR-X  | 35 (0.47)             | 35 (0.44)              | 0.8393 |                       |
| UTR-X/UTR-X  | 36 (0.48)             | 38 (0.48)              |        |                       |
| <b>UTR-2</b> |                       |                        |        |                       |
| pos          | 34 (0.45)             | 38 (0.48)              |        |                       |
| neg          | 41 (0.55)             | 41 (0.52)              | 0.7308 | 0.895 (0.475 – 1.686) |
| Genotypes    |                       |                        |        |                       |
| UTR-2/UTR-2  | 4 (0.05)              | 9 (0.11)               |        |                       |
| UTR-2/UTR-X  | 30 (0.40)             | 29 (0.37)              | 0.3990 |                       |
| UTR-X/UTR-X  | 41 (0.55)             | 41 (0.52)              |        |                       |
| <b>UTR-3</b> |                       |                        |        |                       |
| pos          | 16 (0.21)             | 10 (0.13)              |        |                       |
| neg          | 59 (0.79)             | 69 (0.87)              | 0.1509 | 1.871 (0.789 – 4.437) |
| Genotypes    |                       |                        |        |                       |
| UTR-3/UTR-3  | 1 (0.01)              | 0 (0.00)               |        |                       |
| UTR-3/UTR-X  | 15 (0.20)             | 10 (0.13)              | 0.2620 |                       |
| UTR-X/UTR-X  | 59 (0.79)             | 69 (0.87)              |        |                       |
| <b>UTR-4</b> |                       |                        |        |                       |
| pos          | 24 (0.32)             | 21 (0.27)              |        |                       |
| neg          | 51 (0.68)             | 58 (0.73)              | 0.4600 | 1.300 (0.648 – 2.608) |
| Genotypes    |                       |                        |        |                       |
| UTR-4/UTR-4  | 1 (0.01)              | 2 (0.03)               |        |                       |
| UTR-4/UTR-X  | 23 (0.31)             | 19 (0.24)              | 0.5884 |                       |
| UTR-X/UTR-X  | 51 (0.68)             | 58 (0.73)              |        |                       |
| <b>UTR-5</b> |                       |                        |        |                       |
| pos          | 2 (0.03)              | 4 (0.05)               |        |                       |
| neg          | 73 (0.97)             | 75 (0.95)              | 0.4423 | 0.514 (0.091 – 2.892) |
| Genotypes    |                       |                        |        |                       |
| UTR-5/UTR-5  | 0 (0.00)              | 0 (0.00)               |        |                       |
| UTR-5/UTR-X  | 2 (0.03)              | 4 (0.05)               | n.d.   |                       |
| UTR-X/UTR-X  | 73 (0.97)             | 75 (0.95)              |        |                       |
| <b>UTR-6</b> |                       |                        |        |                       |
| pos          | 3 (0.04)              | 8 (0.10)               |        |                       |
| neg          | 72 (0.96)             | 71 (0.90)              | 0.1401 | 0.370 (0.094 – 1.451) |
| Genotypes    |                       |                        |        |                       |
| UTR-6/UTR-6  | 0 (0.00)              | 1 (0.01)               |        |                       |
| UTR-6/UTR-X  | 3 (0.04)              | 7 (0.09)               | 0.2858 |                       |
| UTR-X/UTR-X  | 72 (0.96)             | 71 (0.90)              |        |                       |
| <b>UTR-7</b> |                       |                        |        |                       |
| pos          | 7 (0.09)              | 9 (0.11)               |        |                       |
| neg          | 68 (0.91)             | 70 (0.89)              | 0.6755 | 0.800 (0.282 – 2.272) |
| Genotypes    |                       |                        |        |                       |

|                   |           |           |        |                        |
|-------------------|-----------|-----------|--------|------------------------|
| UTR-7/UTR-7       | 1 (0.01)  | 0 (0.00)  |        |                        |
| UTR-7/UTR-X       | 6 (0.08)  | 9 (0.11)  | 0.4662 |                        |
| UTR-X/UTR-X       | 68 (0.91) | 70 (0.89) |        |                        |
| <b>UTR-18</b>     |           |           |        |                        |
| pos               | 5 (0.07)  | 4 (0.05)  |        |                        |
| neg               | 70 (0.93) | 75 (0.95) | 0.6716 | 1.339 (0.3455 – 5.191) |
| Genotypes         |           |           |        |                        |
| UTR-18/UTR-18     | 0 (0.00)  | 0 (0.00)  |        |                        |
| UTR-18/X          | 5 (0.07)  | 4 (0.05)  | n.d.   |                        |
| UTR-X/UTR-X       | 70 (0.93) | 75 (0.95) |        |                        |
| <b>UTR-undes.</b> |           |           |        |                        |
| pos               | 0 (0.00)  | 2 (0.03)  |        |                        |
| neg               | 75 (1.00) | 77 (0.97) | n.d.   |                        |
| Genotypes         |           |           |        |                        |
| UTR-?/UTR-?       | 0 (0.00)  | 2 (0.03)  |        |                        |
| UTR-?/UTR-X       | 0 (0.00)  | 0 (0.00)  | n.d.   |                        |
| UTR-X/UTR-X       | 75 (1.00) | 77 (0.97) |        |                        |

CI – confidence interval; EOC – epithelial ovarian cancer; HD – healthy donors; n.d. – not determined; neg – negative; OR – odds ratio; pos – positive; undes. – undesignated; UTR – untranslated region; UTR-X – every other UTR

<sup>a</sup>p-values were calculated by GraphPad Prism using two-sided Chi-square test, alpha<0.05; OD, odds ratio

**Supplementary Data 4. Individual analysis of eight SNPs<sup>a</sup> encompassing the *HLA-G* 3'UTR and their association with disease status and outcome.**

| <b>Metastasis formation</b> |                 | <b>M<sub>1</sub><sup>c</sup></b>  | <b>M<sub>0</sub><sup>c</sup></b>  | <b>p<sup>b</sup></b> | <b>OR<br/>(95% CI)</b> |
|-----------------------------|-----------------|-----------------------------------|-----------------------------------|----------------------|------------------------|
| <b>IN/DEL</b>               | DEL/DEL         | 9                                 | 20                                | 0.5990               | 1.43 (0.51 – 3.95)     |
|                             | IN/DEL or IN/IN | 12                                | 38                                |                      |                        |
| <b>+3003</b>                | TT              | 17                                | 40                                | 0.3982               | 1.91 (0.56 – 6.50)     |
|                             | CC or CT        | 4                                 | 18                                |                      |                        |
| <b>+3010</b>                | GG              | 10                                | 15                                | 0.0993               | 2.60 (0.92 – 7.37)     |
|                             | CC or CG        | 11                                | 43                                |                      |                        |
| <b>+3027</b>                | CC              | 20                                | 50                                | 0.4316               | 3.20 (0.38 – 27.28)    |
|                             | AA or CA        | 1                                 | 8                                 |                      |                        |
| <b>+3035</b>                | CC              | 20                                | 46                                | 0.1666               | 5.22 (0.63 – 42.9)     |
|                             | TT or CT        | 1                                 | 12                                |                      |                        |
| <b>+3142</b>                | CC              | 9                                 | 17                                | 0.2870               | 1.80 (0.64 – 5.08)     |
|                             | GG or CG        | 12                                | 41                                |                      |                        |
| <b>+3187</b>                | GG              | 5                                 | 1                                 | <b>0.0044</b>        | 17.81 (1.94 – 163.7)   |
|                             | AA or AG        | 16                                | 57                                |                      |                        |
| <b>+3196</b>                | GG              | 4                                 | 7                                 | 0.4704               | 1.71 (0.45 – 6.59)     |
|                             | CC or CG        | 17                                | 51                                |                      |                        |
| <b>+3227</b>                | AA              | 0                                 | 4                                 | 0.5687               | 0.28 (0.01 – 5.46)     |
|                             | GG or AG        | 21                                | 54                                |                      |                        |
| <b>Nodal status</b>         |                 | <b>pN<sub>1</sub><sup>c</sup></b> | <b>pN<sub>0</sub><sup>c</sup></b> | <b>p<sup>b</sup></b> | <b>OR<br/>(95% CI)</b> |
| <b>IN/DEL</b>               | DEL/DEL         | 12                                | 5                                 | 0.7568               | 1.49 (0.42 – 5.20)     |
|                             | IN/DEL or IN/IN | 21                                | 13                                |                      |                        |
| <b>+3003</b>                | TT              | 26                                | 12                                | 0.5024               | 1.86 (0.51 – 6.73)     |
|                             | CC or CT        | 7                                 | 6                                 |                      |                        |
| <b>+3010</b>                | GG              | 11                                | 3                                 | 0.3259               | 2.50 (0.59 – 10.51)    |
|                             | CC or CG        | 22                                | 15                                |                      |                        |
| <b>+3027</b>                | CC              | 28                                | 16                                | 1.0000               | 0.70 (0.12 – 4.03)     |
|                             | AA or CA        | 5                                 | 2                                 |                      |                        |
| <b>+3035</b>                | CC              | 28                                | 13                                | 0.2957               | 2.15 (0.53 – 8.77)     |
|                             | TT or CT        | 5                                 | 5                                 |                      |                        |
| <b>+3142</b>                | CC              | 11                                | 4                                 | 0.5268               | 1.75 (0.46 – 6.59)     |
|                             | GG or CG        | 22                                | 14                                |                      |                        |
| <b>+3187</b>                | GG              | 2                                 | 0                                 | 0.5341               | 2.94 (0.13 – 64.6)     |
|                             | AA or AG        | 31                                | 18                                |                      |                        |
| <b>+3196</b>                | GG              | 6                                 | 1                                 | 0.3979               | 3.78 (0.42 – 34.19)    |
|                             | CC or CG        | 27                                | 17                                |                      |                        |
| <b>+3227</b>                | AA              | 2                                 | 1                                 | 1.0000               | 1.10 (0.09 – 13.00)    |
|                             | GG or AG        | 31                                | 17                                |                      |                        |
| <b>FIGO</b>                 |                 | <b>III-IV<sup>c</sup></b>         | <b>I-II<sup>c</sup></b>           | <b>p<sup>b</sup></b> | <b>OR<br/>(95% CI)</b> |
| <b>IN/DEL</b>               | DEL/DEL         | 29                                | 0                                 | 0.0802               | 8.618 (0.47 – 158.90)  |

|                             |                 |                                |                                |                             |                        |
|-----------------------------|-----------------|--------------------------------|--------------------------------|-----------------------------|------------------------|
|                             | IN/DEL or IN/IN | 44                             | 6                              |                             |                        |
| <b>+3003</b>                | TT              | 53                             | 4                              | 0.6686                      | 1.33 (0.22 – 7.81)     |
|                             | CC or CT        | 20                             | 2                              |                             |                        |
| <b>+3010</b>                | GG              | 25                             | 0                              | 0.1690                      | 6.84 (0.37 – 126.30)   |
|                             | CC or CG        | 48                             | 6                              |                             |                        |
| <b>+3027</b>                | CC              | 65                             | 5                              | 0.5283                      | 1.63 (0.17 – 15.72)    |
|                             | AA or CA        | 8                              | 1                              |                             |                        |
| <b>+3035</b>                | CC              | 64                             | 2                              | <b>0.0058</b>               | 14.22 (2.27 – 89.16)   |
|                             | TT or CT        | 9                              | 4                              |                             |                        |
| <b>+3142</b>                | CC              | 26                             | 0                              | 0.1701                      | 7.25 (0.39 – 134.00)   |
|                             | GG or CG        | 47                             | 6                              |                             |                        |
| <b>+3187</b>                | GG              | 6                              | 0                              | 1.0000                      | 1.25 (0.06 – 24.84)    |
|                             | AA or AG        | 67                             | 6                              |                             |                        |
| <b>+3196</b>                | GG              | 11                             | 0                              | 0.5875                      | 2.39 (0.13 – 45.48)    |
|                             | CC or CG        | 62                             | 6                              |                             |                        |
| <b>+3227</b>                | AA              | 4                              | 0                              | 1.0000                      | 0.84 (0.04 – 17.44)    |
|                             | GG or AG        | 69                             | 6                              |                             |                        |
| <b>CTC prior to therapy</b> |                 | <b>CTC<br/>pos<sup>c</sup></b> | <b>CTC<br/>neg<sup>c</sup></b> | <b><i>p</i><sup>b</sup></b> | <b>OR<br/>(95% CI)</b> |
| <b>IN/DEL</b>               | DEL/DEL         | 4                              | 25                             |                             |                        |
|                             | IN/DEL or IN/IN | 12                             | 37                             | 0.3854                      | 0.49 (0.14 – 1.70)     |
| <b>+3003</b>                | TT              | 14                             | 43                             | 0.2100                      | 3.09 (0.64 – 14.98)    |
|                             | CC or CT        | 2                              | 19                             |                             |                        |
| <b>+3010</b>                | GG              | 3                              | 22                             | 0.2347                      | 0.42 (0.11 – 1.63)     |
|                             | CC or CG        | 13                             | 40                             |                             |                        |
| <b>+3027</b>                | CC              | 15                             | 54                             | 0.6764                      | 2.22 (0.26 – 19.20)    |
|                             | AA or CA        | 1                              | 8                              |                             |                        |
| <b>+3035</b>                | CC              | 15                             | 50                             | 0.2829                      | 3.60 (0.43 – 30.01)    |
|                             | TT or CT        | 1                              | 12                             |                             |                        |
| <b>+3142</b>                | CC              | 4                              | 22                             | 0.5527                      | 0.61 (0.17 – 2.10)     |
|                             | GG or CG        | 12                             | 40                             |                             |                        |
| <b>+3187</b>                | GG              | 0                              | 6                              | 0.3363                      | 0.26 (0.01 – 4.93)     |
|                             | AA or AG        | 16                             | 56                             |                             |                        |
| <b>+3196</b>                | GG              | 6                              | 5                              | <b>0.0075</b>               | 6.84 (1.75 – 26.76)    |
|                             | CC or CG        | 10                             | 57                             |                             |                        |
| <b>+3227</b>                | AA              | 2                              | 2                              | 0.1847                      | 4.29 (0.55 – 33.12)    |
|                             | GG or AG        | 14                             | 60                             |                             |                        |
| <b>DTC prior to therapy</b> |                 | <b>DTC<br/>pos<sup>c</sup></b> | <b>DTC<br/>neg<sup>c</sup></b> | <b><i>p</i><sup>b</sup></b> | <b>OR<br/>(95% CI)</b> |
| <b>IN/DEL</b>               | DEL/DEL         | 10                             | 19                             |                             |                        |
|                             | IN/DEL or IN/IN | 19                             | 30                             | 0.8101                      | 0.83 (0.32 – 217)      |
| <b>+3003</b>                | TT              | 23                             | 34                             | 0.4323                      | 1.69 (0.57 – 5.00)     |
|                             | CC or CT        | 6                              | 15                             |                             |                        |
| <b>+3010</b>                | GG              | 9                              | 16                             | 1.0000                      | 0.93 (0.35 – 2.49)     |
|                             | CC or CG        | 20                             | 33                             |                             |                        |
| <b>+3027</b>                | CC              | 27                             | 42                             | 0.4715                      | 2.25 (0.43 – 11.65)    |
|                             | AA or CA        | 2                              | 7                              |                             |                        |

|                             |                 |                            |                            |                             |                     |
|-----------------------------|-----------------|----------------------------|----------------------------|-----------------------------|---------------------|
| <b>+3035</b>                | CC              | 25                         | 40                         | 0.7571                      | 1.40 (0.39 – 5.06)  |
|                             | TT or CT        | 4                          | 9                          |                             |                     |
| <b>+3142</b>                | CC              | 11                         | 15                         | 0.6204                      | 1.39 (0.53 – 3.64)  |
|                             | GG or CG        | 18                         | 34                         |                             |                     |
| <b>+3187</b>                | GG              | 2                          | 4                          | 1.0000                      | 0.83 (0.14 – 4.86)  |
|                             | AA or AG        | 27                         | 45                         |                             |                     |
| <b>+3196</b>                | GG              | 8                          | 3                          | <b>0.0156</b>               | 5.84 (1.40 – 24.27) |
|                             | CC or CG        | 21                         | 46                         |                             |                     |
| <b>+3227</b>                | AA              | 2                          | 2                          | 0.6254                      | 1.74 (0.23 – 13.08) |
|                             | GG or AG        | 27                         | 47                         |                             |                     |
| <b>CTC after to therapy</b> |                 | <b>CTC pos<sup>c</sup></b> | <b>CTC neg<sup>c</sup></b> | <b><i>p</i><sup>b</sup></b> | <b>OR (95% CI)</b>  |
| <b>IN/DEL</b>               | DEL/DEL         | 3                          | 8                          | 0.6888                      | 0.54 (0.10- 2.77)   |
|                             | IN/DEL or IN/IN | 7                          | 10                         |                             |                     |
| <b>+3003</b>                | TT              | 8                          | 13                         | 1.0000                      | 1.54 (0.24 – 9.90)  |
|                             | CC or CT        | 2                          | 5                          |                             |                     |
| <b>+3010</b>                | GG              | 1                          | 6                          | 0.3642                      | 0.22 (0.02 – 2.19)  |
|                             | CC or CG        | 9                          | 12                         |                             |                     |
| <b>+3027</b>                | CC              | 9                          | 18                         | 0.3571                      | 0.17 (0.01 – 4.62)  |
|                             | AA or CA        | 1                          | 0                          |                             |                     |
| <b>+3035</b>                | CC              | 9                          | 18                         | 0.3571                      | 0.17 (0.01 – 4.62)  |
|                             | TT or CT        | 1                          | 0                          |                             |                     |
| <b>+3142</b>                | CC              | 2                          | 7                          | 0.4170                      | 0.39 (0.06 – 2.42)  |
|                             | GG or CG        | 8                          | 11                         |                             |                     |
| <b>+3187</b>                | GG              | 0                          | 2                          | 0.5238                      | 0.31 (0.01 – 7.22)  |
|                             | AA or AG        | 10                         | 16                         |                             |                     |
| <b>+3196</b>                | GG              | 3                          | 4                          | 0.6744                      | 1.50 (0.26 – 8.64)  |
|                             | CC or CG        | 7                          | 14                         |                             |                     |
| <b>+3227</b>                | AA              | 0                          | 1                          | 1.0000                      | 0.56 (0.02 – 14.94) |
|                             | GG or AG        | 10                         | 17                         |                             |                     |

CI – confidence interval; CTC – circulating tumor cells; DTC – disseminated tumor cells; M0 – no metastasis formation; M1 – metastasis formation; neg – negative; OR – odds ration; pos – positive

<sup>a</sup>*HLA-G* 3'UTR SNP at position +3001, +3032, +3052, +3092, +3111 and +3121 were not included in this overview as all subjects had the same genotype.

<sup>b</sup>p-values were calculated by GraphPad prism using Fisher's exact test, alpha<0.05

<sup>c</sup>numbers reflect cases
